# Supplementary material for: A Genome-Wide Association Search for Type 2 Diabetes Genes in African Americans
Source: PLoS One. 2012 Jan 4;7(1):e29202. doi: 10.1371/journal.pone.0029202 (PMC3251563; doi:10.1371/journal.pone.0029202)
Supplement: Table S2 — GWAS, Replication, T2DM, IRAS and IRASFS P-values for 122 GWAS SNPs genotyped on replication and validation samples. SNPs are ordered by chromosome and position (NCBI Build 36.1) with the major/minor alleles (positive strand). For each cohort, minor allele frequency (MAF) for case and control populations are listed with the reference allele (minor allele) and corresponding additive P-value and odds ratio (OR) with associated 95% confidence interval (CI) with respect to the minor allele. Note: For IRAS-FS MAFs are derived from the overall sample including relatives. In addition, allele frequencies has been extracted from HapMap Yoruba (YRI) and CEPH (CEU) samples for comparison. Rows in red type represent the five loci which are the focus of the manuscript. (XLS) [file pone.0029202.s004.xls]

## Sheet: Val_GWAS+_PC1
Supplementary Table 2. GWAS, Replication, T2DM, IRAS and IRASFS P-values for 122 GWAS SNPs genotyped on replication and validation samples. SNPs are ordered by chromosome and position (NCBI Build 36.1) with the major/minor alleles (positive strand). For each cohort, minor allele frequency (MAF) for case and control populations are listed with the reference allele (minor allele) and corresponding …
					GWAS (PC1 adjusted)						Replication (FRAPPE adjusted)						T2DM (FRAPPE adjusted)						IRAS (FRAPPE adjusted)						IRASFS (FRAPPE adjusted)
					T2DM-ESRD (n=965)						T2DM-ESRD (n=709)						T2DM (n=1,246)						T2DM (n=115)						T2DM (n=97)						HapMap
Locus					Control (n=1,029)						Control (n=690)						Control (n=927)						Control (n=164)						Control (n=507)
					MAF		Ref	Additive			MAF		Ref	Additive			MAF		Ref	Additive			MAF		Ref	Additive			MAF		Ref	Additive			Ref	MAF
SNP	Chr	Position	Alleles		Case	Control	Allele	P-value	OR (95%CI)		Case	Control	Allele	P-value	OR (95%CI)		Case	Control	Allele	P-value	OR (95%CI)		Case	Control	Allele	P-value	OR (95%CI)		Case	Control	Allele	P-value	OR (95%CI)		Allele	CEU	YRI
rs7542900	1	94842629	C/T		0.404	0.462	T	0.000142696	0.78 (0.69-0.89)		0.409	0.419	T	0.500102	0.95 (0.80-1.11)		0.384	0.428	T	0.00333215	0.83 (0.74-0.94)		0.3899	0.4335	T	0.3082	0.84 (0.60-1.17)		0.4043	0.4204	T	0.579978	0.95 (0.79-1.14)		T	0.198	0.415
rs1999157	1	202903493	G/A		0.245	0.28	A	0.0786628	0.88 (0.76-1.01)		0.244	0.268	A	0.525652	0.95 (1.04-1.12)		0.258	0.289	A	0.087599	0.89 (0.77-1.02)		0.323	0.3145	A	0.5617	1.12 (0.77-1.63)		0.2634	0.247	A	0.725307	1.04 (0.84-1.29)		A	0.757	0.159
rs11118918	1	206162311	G/T		0.311	0.259	T	0.000550701	1.28 (1.11-1.47)		0.301	0.259	T	0.0154733	1.24 (1.02-1.47)		0.287	0.287	T	0.98116	1.00 (0.87-1.14)		0.2432	0.2613	T	0.6168	0.91 (0.62-1.33)		0.2211	0.2766	T	0.192981	0.87 (0.71-1.07)		T	0.133	0.321
rs17014015	1	207304074	C/T		0.119	0.082	T	0.000205301	1.50 (1.21-1.86)		0.117	0.091	T	0.0335669	1.31 (0.97-1.69)		0.106	0.101	T	0.669934	1.04 (0.85-1.28)		0.1091	0.1139	T	0.8025	0.93 (0.53-1.64)		0.1263	0.1114	T	0.578446	1.08 (0.81-1.44)		T	0.14	0.137
rs2404354	1	221907021	C/T		0.409	0.351	T	0.000959628	1.24 (1.09-1.41)		0.387	0.35	T	0.103869	1.14 (0.79-1.33)		0.359	0.359	T	0.790643	0.98 (0.87-1.12)		0.3426	0.3045	T	0.3291	1.20 (0.83-1.73)		0.2784	0.3122	T	0.501046	0.93 (0.76-1.15)		T	0.08	0.465
rs867362	1	222705706	C/A		0.375	0.431	A	0.00429611	0.83 (0.73-0.94)		0.385	0.418	A	0.271414	0.92 (0.62-1.07)		0.409	0.434	A	0.232756	0.93 (0.82-1.05)		0.4174	0.4684	A	0.3285	0.83 (0.58-1.20)		0.4889	0.466	A	0.974422	1.00 (0.83-1.20)		A	0.748	0.327
rs4659689	1	234856483	G/A		0.094	0.133	A	0.00409933	0.74 (0.60-0.91)		0.093	0.132	A	0.056829	0.79 (0.60-1.01)		0.115	0.133	A	0.271054	0.90 (0.74-1.09)		0.1318	0.193	A	0.1332	0.68 (0.41-1.13)		0.1923	0.1563	A	0.516444	1.09 (0.84-1.41)		A	0.612	0.022
rs4659485	1	235212541	T/C		0.07	0.103	C	0.00596337	0.72 (0.57-0.91)		0.066	0.093	C	0.148593	0.81 (0.66-1.08)		0.078	0.112	C	0.00186515	0.71 (0.57-0.88)		0.1237	0.1654	C	0.2896	0.73 (0.41-1.30)		0.1471	0.1312	C	0.917721	0.98 (0.73-1.32)		C	0.522	0
rs1316429	1	236068518	C/G		0.137	0.185	G	0.000274885	0.73 (0.62-0.87)		0.151	0.186	G	0.0373305	0.81 (0.72-0.99)		0.154	0.149	G	0.449219	1.07 (0.90-1.27)		0.1726	0.1969	G	0.5709	0.88 (0.57-1.36)		0.1632	0.1541	G	0.950898	0.99 (0.77-1.28)		G	0.344	0.128
rs12031507	1	244110878	T/C		0.138	0.185	C	0.00297851	0.76 (0.64-0.91)		0.152	0.184	C	0.226653	0.88 (0.74-1.08)		0.152	0.197	C	0.00197677	0.77 (0.66-0.91)		0.1864	0.1921	C	0.824	1.05 (0.66-1.69)		0.25	0.2006	C	0.233302	1.15 (0.91-1.45)		C	0.768	0.053
rs10888287	1	246184039	T/G		0.439	0.503	G	0.000503304	0.80 (0.71-0.91)		0.444	0.495	G	0.0482466	0.86 (0.63-1.00)		0.485	0.488	G	0.880551	1.01 (0.89-1.14)		0.4866	0.5096	G	0.8821	0.98 (0.70-1.36)		0.4787	0.4687	T	0.711477	1.03 (0.87-1.23)		G	0.982	0.367
rs713586	2	25011512	C/T		0.108	0.152	T	0.00066851	0.72 (0.59-0.87)		0.106	0.137	T	0.0654189	0.80 (0.69-1.01)		0.131	0.16	T	0.0430922	0.83 (0.70-0.99)		0.1903	0.175	T	0.4432	1.20 (0.76-1.89)		0.2074	0.1508	T	0.126592	1.20 (0.95-1.52)		T	0.527	0.062
rs12233134	2	25182520	C/T		0.064	0.096	T	0.000438532	0.66 (0.52-0.83)		0.085	0.096	T	0.419655	0.90 (0.86-1.17)		0.097	0.103	T	0.706295	0.96 (0.78-1.18)		0.1	0.1218	T	0.4864	0.82 (0.47-1.44)		0.1075	0.0787	T	0.156278	1.26 (0.92-1.73)		T	0.19	0.062
rs11884600	2	47238105	A/G		0.172	0.221	G	0.000785759	0.76 (0.65-0.89)		0.191	0.198	G	0.651472	1.05 (0.67-1.27)		0.185	0.213	G	0.102836	0.88 (0.76-1.03)		0.2027	0.2197	G	0.8112	0.95 (0.61-1.47)		0.2391	0.2365	G	0.872999	0.98 (0.80-1.20)		G	0.544	0.08
rs7560163	2	151346182	C/G		0.098	0.131	G	0.000559717	0.71 (0.58-0.86)		0.102	0.113	G	0.212166	0.85 (0.98-1.09)		0.112	0.161	G	3.6943e-06	0.65 (0.55-0.78)		0.1283	0.1149	G	0.7996	1.07 (0.65-1.75)		0.0842	0.1449	G	0.0312969	0.73 (0.54-0.98)		G	0.005	0.117
rs11886140	2	193090011	G/A		0.478	0.429	A	0.00205895	1.22 (1.07-1.38)		0.462	0.434	A	0.0945906	1.14 (0.94-1.33)		0.45	0.455	A	0.766244	0.98 (0.87-1.11)		0.463	0.4545	A	0.9132	1.02 (0.73-1.42)		0.4271	0.4366	A	0.75201	0.97 (0.81-1.16)		A	0.487	0.45
rs1263627	2	207685498	A/T		0.282	0.229	T	0.000166422	1.31 (1.14-1.52)		0.264	0.242	T	0.185621	1.13 (0.67-1.34)		0.268	0.27	T	0.881414	0.99 (0.86-1.13)		0.2342	0.2484	T	0.7009	0.93 (0.62-1.37)		0.2234	0.2039	T	0.716808	1.04 (0.83-1.30)		T	0.27	0.252
rs10513598	3	164186714	G/A		0.096	0.118	A	0.0358582	0.80 (0.66-0.99)		0.094	0.107	A	0.24545	0.86 (0.73-1.11)		0.113	0.096	A	0.0722456	1.20 (0.98-1.46)		0.1062	0.1195	A	0.6207	0.87 (0.50-1.51)		0.1436	0.1479	A	0.895248	1.02 (0.78-1.33)		A	0.097	0.093
rs9798973	3	164227507	C/T		0.363	0.416	T	0.000213262	0.78 (0.69-0.89)		0.377	0.415	T	0.043119	0.85 (0.74-1.00)		0.396	0.399	T	0.768462	0.98 (0.87-1.11)		0.3727	0.3969	T	0.5399	0.89 (0.63-1.28)		0.4202	0.4737	T	0.296723	0.91 (0.75-1.09)		T	0.329	0.427
rs9647385	3	164229836	T/C		0.362	0.414	C	0.000306847	0.79 (0.69-0.90)		0.376	0.414	C	0.0531656	0.86 (0.73-1.00)		0.395	0.385	C	0.60975	1.03 (0.91-1.17)		0.3649	0.3981	C	0.4072	0.86 (0.60-1.23)		0.4202	0.4747	C	0.285912	0.90 (0.75-1.08)		C	0.323	0.434
rs4260465	3	164231046	C/G		0.364	0.414	G	0.000431066	0.79 (0.70-0.90)		0.381	0.421	G	0.038206	0.85 (0.63-0.99)		0.425	0.399	G	0.110669	1.10 (0.98-1.24)		0.386	0.4321	G	0.2731	0.83 (0.60-1.16)		0.4409	0.4898	G	0.371493	0.92 (0.77-1.10)		G	0.323	0.434
rs6838250	4	7024085	G/C		0.169	0.212	C	0.000292903	0.74 (0.63-0.87)		0.169	0.204	C	0.00727394	0.76 (0.78-0.93)		0.179	0.168	C	0.536219	1.05 (0.90-1.23)		0.1696	0.1781	C	0.8025	0.94 (0.60-1.48)		0.234	0.1941	C	0.395362	1.10 (0.88-1.37)		C	0.075	0.159
rs3775045	4	96345907	C/T		0.341	0.275	T	1.14808e-05	1.35 (1.18-1.55)		0.334	0.298	T	0.0324405	1.20 (1.06-1.41)		0.313	0.294	T	0.18688	1.09 (0.96-1.25)		0.3273	0.2816	T	0.2771	1.22 (0.85-1.76)		0.2833	0.2985	T	0.60022	0.95 (0.77-1.16)		T	0.217	0.305
rs3775043	4	96347702	G/T		0.344	0.286	T	6.82291e-05	1.31 (1.15-1.50)		0.348	0.305	T	0.00862978	1.25 (0.58-1.47)		0.322	0.315	T	0.55678	1.04 (0.91-1.18)		0.3423	0.3025	T	0.2827	1.22 (0.85-1.77)		0.2713	0.3192	A	0.23734	0.88 (0.72-1.09)		T	0.296	0.301
rs9307156	4	96348844	T/C		0.077	0.097	C	0.0125027	0.75 (0.60-0.94)		0.09	0.113	C	0.0247572	0.75 (1.00-0.96)		0.094	0.09	C	0.762981	1.03 (0.84-1.27)		0.0856	0.0823	C	0.9407	1.02 (0.55-1.90)		0.0957	0.0697	C	0.239491	1.21 (0.88-1.66)		C	0	0.071
rs11730446	4	96382267	A/G		0.459	0.403	G	0.000623085	1.24 (1.10-1.41)		0.459	0.424	G	0.0465124	1.17 (0.76-1.37)		0.423	0.42	G	0.786085	1.02 (0.90-1.15)		0.4649	0.4437	G	0.6227	1.09 (0.77-1.54)		0.3564	0.4485	G	0.0390604	0.82 (0.68-0.99)		G	0.403	0.478
rs3775002	4	96390306	C/T		0.432	0.5	T	6.70492e-05	0.78 (0.68-0.88)		0.434	0.463	T	0.116217	0.88 (0.78-1.03)		0.466	0.484	T	0.265642	0.93 (0.83-1.05)		0.4505	0.4679	T	0.7168	0.94 (0.66-1.33)		0.484	0.4582	T	0.76955	1.03 (0.86-1.23)		T	0.593	0.416
rs96720	4	104655322	G/A		0.426	0.475	A	0.00708618	0.84 (0.74-0.95)		0.444	0.474	A	0.203844	0.91 (0.76-1.05)		0.451	0.483	A	0.0774621	0.90 (0.79-1.01)		0.4495	0.5099	A	0.2601	0.82 (0.59-1.15)		0.4375	0.47	A	0.663688	0.96 (0.79-1.16)		A	0.805	0.403
rs454937	4	104672296	A/T		0.367	0.423	T	0.00230338	0.82 (0.72-0.93)		0.384	0.418	T	0.115894	0.88 (0.79-1.03)		0.404	0.415	T	0.761005	0.98 (0.87-1.11)		0.4286	0.4719	T	0.4098	0.87 (0.62-1.21)		0.383	0.4116	T	0.617501	0.95 (0.79-1.15)		T	0.805	0.29
rs437124	4	104686490	T/C		0.356	0.41	C	0.00373689	0.82 (0.72-0.94)		0.387	0.412	C	0.289659	0.92 (0.99-1.07)		0.396	0.406	C	0.864638	0.99 (0.87-1.12)		0.4128	0.4645	C	0.3265	0.84 (0.60-1.19)		0.375	0.3996	C	0.759886	0.97 (0.80-1.18)		C	0.814	0.305
rs10002719	4	104686716	C/T		0.52	0.463	T	0.000879563	1.24 (1.09-1.41)		0.499	0.46	T	0.0761879	1.14 (0.78-1.33)		0.486	0.467	T	0.33946	1.06 (0.94-1.20)		0.4866	0.4399	T	0.3357	1.19 (0.84-1.68)		0.4516	0.4877	T	0.317532	0.91 (0.78-1.1)		T	0.19	0.527
rs445716	4	104691159	C/T		0.356	0.41	T	0.00373689	0.82 (0.72-0.94)		0.38	0.409	T	0.21112	0.91 (1.06-1.06)		0.396	0.405	T	0.820029	0.99 (0.87-1.12)		0.4018	0.4752	T	0.1414	0.77 (0.55-1.09)		0.3777	0.4008	T	0.784413	0.97 (0.81-1.17)		T	0.81	0.305
rs891382	4	147371790	A/G		0.085	0.059	G	0.000318615	1.56 (1.22-1.99)		0.081	0.065	G	0.0182594	1.42 (0.68-1.91)		0.063	0.069	G	0.73909	0.96 (0.76-1.22)		0.0885	0.1094	G	0.5168	0.83 (0.47-1.47)		0.1316	0.1056	G	0.378024	1.14 (0.85-1.51)		G	0.274	0.018
rs7697691	4	182853951	A/G		0.243	0.285	G	0.00164908	0.79 (0.69-0.92)		0.243	0.285	G	0.0127054	0.81 (0.67-0.96)		0.273	0.268	G	0.756348	1.02 (0.89-1.17)		0.2593	0.2433	G	0.7056	1.08 (0.72-1.61)		0.2448	0.2565	G	0.749697	1.03 (0.84-1.28)		G	0.19	0.314
rs6451146	5	34599780	T/C		0.13	0.179	C	3.99848e-05	0.70 (0.58-0.83)		0.137	0.16	C	0.0730219	0.82 (0.74-1.02)		0.133	0.146	C	0.237622	0.90 (0.76-1.07)		0.1273	0.1741	C	0.1862	0.73 (0.46-1.16)		0.1398	0.176	C	0.292965	0.87 (0.67-1.13)		C	0.209	0.124
rs6874493	5	76737495	G/A		0.405	0.466	A	0.000223567	0.79 (0.70-0.90)		0.398	0.435	A	0.0835209	0.87 (0.66-1.02)		0.427	0.44	A	0.409358	0.95 (0.84-1.07)		0.3964	0.3781	A	0.6976	1.07 (0.76-1.52)		0.4632	0.4302	A	0.420486	1.08 (0.90-1.31)		A	0.473	0.416
rs7710366	5	113808086	T/G		0.168	0.214	G	0.00149354	0.77 (0.65-0.90)		0.162	0.198	G	0.0304548	0.80 (0.80-0.98)		0.187	0.18	G	0.363996	1.08 (0.92-1.26)		0.1518	0.2373	G	0.02375	0.59 (0.37-0.93)		0.1957	0.2474	G	0.170723	0.86 (0.68-1.07)		G	0.456	0.128
rs247205	5	128111380	G/A		0.509	0.442	A	3.9213e-06	1.35 (1.19-1.53)		0.449	0.474	A	0.390102	0.94 (0.87-1.09)		0.468	0.48	A	0.641752	0.97 (0.86-1.10)		0.4911	0.4689	G	0.5956	1.10 (0.78-1.53)		0.4728	0.4464	G	0.514266	1.06 (0.89-1.27)		A	0.708	0.447
rs247096	5	128121776	T/C		0.256	0.207	C	0.000256131	1.32 (1.14-1.53)		0.244	0.193	C	0.00161184	1.34 (1.11-1.61)		0.224	0.243	C	0.203219	0.91 (0.79-1.05)		0.2613	0.2419	C	0.5871	1.12 (0.75-1.67)		0.2979	0.2909	C	0.776999	1.03 (0.84-1.26)		C	0.332	0.265
rs2161305	5	128133406	T/A		0.254	0.204	A	0.000206268	1.32 (1.14-1.54)		0.241	0.191	A	0.00207679	1.33 (1.14-1.59)		0.223	0.24	A	0.242562	0.92 (0.80-1.06)		0.2387	0.2387	A	0.9758	1.01 (0.67-1.51)		0.2969	0.2846	A	0.667458	1.05 (0.86-1.28)		A	0.332	0.261
rs1890061	6	47819559	C/T		0.508	0.461	T	0.00149564	1.23 (1.08-1.39)		0.483	0.449	T	0.0871518	1.14 (0.64-1.32)		0.466	0.474	T	0.786062	0.98 (0.87-1.11)		0.45	0.4871	T	0.4857	0.88 (0.62-1.25)		0.3859	0.4542	T	0.128663	0.87 (0.73-1.04)		T	0.659	0.371
rs3822908	6	97706333	T/C		0.125	0.162	C	0.000363396	0.72 (0.6-0.86)		0.121	0.147	C	0.0461902	0.80 (0.66-1.00)		0.145	0.148	C	0.901282	0.99 (0.83-1.18)		0.193	0.1195	C	0.02115	1.76 (1.09-2.85)		0.1915	0.1781	G	1	1.00 (0.79-1.26)		C	0.186	0.088
rs7760831	6	102071536	T/C		0.176	0.222	C	0.000254691	0.75 (0.64-0.87)		0.193	0.224	C	0.0454841	0.82 (1.02-1.00)		0.202	0.175	C	0.035261	1.18 (1.01-1.38)		0.1786	0.1855	C	0.8021	0.94 (0.60-1.48)		0.1421	0.1881	C	0.117803	0.82 (0.64-1.06)		C	0.097	0.177
rs2008860	6	108418960	C/G		0.241	0.203	G	0.000342161	1.32 (1.14-1.54)		0.241	0.217	G	0.0300291	1.22 (1.02-1.47)		0.235	0.246	G	0.751013	0.98 (0.85-1.13)		0.2432	0.236	G	0.6592	1.10 (0.72-1.67)		0.2819	0.2591	G	0.632364	1.05 (0.85-1.31)		G	0.553	0.199
rs208865	6	130114249	C/T		0.118	0.082	T	0.000213566	1.49 (1.21-1.85)		0.115	0.091	T	0.0363993	1.31 (1.02-1.68)		0.097	0.091	T	0.514791	1.07 (0.87-1.32)		0.0811	0.0918	T	0.5517	0.83 (0.44-1.54)		0.0947	0.0988	T	0.665965	0.93 (0.68-1.28)		T	0.062	0.142
rs9493435	6	133129898	T/C		0.505	0.447	C	0.00257846	1.21 (1.07-1.37)		0.509	0.457	C	0.02955	1.18 (0.99-1.37)		0.45	0.45	C	0.762078	0.98 (0.87-1.11)		0.3482	0.3882	C	0.3564	0.85 (0.59-1.21)		0.413	0.4675	C	0.281537	0.91 (0.76-1.08)		C	0.093	0.619
rs7770081	6	133131262	G/T		0.503	0.444	T	0.0018163	1.22 (1.08-1.38)		0.501	0.456	T	0.0593817	1.15 (0.72-1.34)		0.451	0.448	T	0.880876	0.99 (0.88-1.12)		0.3438	0.3882	T	0.3009	0.83 (0.58-1.18)		0.4076	0.4674	T	0.233182	0.90 (0.76-1.06)		T	0.093	0.615
rs1467404	6	133131834	T/C		0.462	0.525	C	0.000921934	0.81 (0.72-0.92)		0.463	0.519	C	0.0202792	0.83 (1.08-0.97)		0.478	0.477	T	0.763	0.98 (0.87-1.11)		0.509	0.4531	T	0.2398	1.23 (0.87-1.74)		0.4309	0.4889	T	0.225986	0.89 (0.74-1.07)		C	0.898	0.35
rs9493454	6	133186322	A/C		0.439	0.376	C	0.000491224	1.25 (1.10-1.42)		0.453	0.395	C	0.00890232	1.24 (1.11-1.45)		0.387	0.4	C	0.282675	0.93 (0.82-1.06)		0.3935	0.3618	C	0.5628	1.11 (0.78-1.59)		0.3925	0.4121	C	0.875428	0.99 (0.82-1.18)		C	0.094	0.531
rs7769051	6	133188489	C/A		0.349	0.289	A	0.000405987	1.27 (1.11-1.45)		0.362	0.3	A	0.00124956	1.31 (1.07-1.54)		0.309	0.312	A	0.703261	0.97 (0.85-1.11)		0.3288	0.2357	A	0.0249	1.55 (1.06-2.28)		0.3118	0.3285	A	0.890608	0.99 (0.82-1.19)		A	0.097	0.4
rs12212934	6	133227281	C/T		0.155	0.132	T	0.0844828	1.16 (0.98-1.39)		0.199	0.155	T	0.00751716	1.28 (1.06-1.54)		0.144	0.125	T	0.0841683	1.17 (0.98-1.40)		0.1339	0.2125	T	0.02746	0.60 (0.38-0.95)		0.1648	0.1584	T	0.58121	1.07 (0.84-1.35)		T	0.049	0.168
rs6930576	6	148746647	G/A		0.337	0.276	A	1.86543e-05	1.34 (1.17-1.54)		0.319	0.274	A	0.00985039	1.25 (0.65-1.48)		0.297	0.289	A	0.514211	1.05 (0.91-1.19)		0.3451	0.3272	A	0.559	1.12 (0.77-1.61)		0.3368	0.3119	A	0.602737	1.05 (0.87-1.27)		A	0.341	0.243
rs12699927	7	17978277	A/T		0.078	0.113	T	0.00170401	0.70 (0.56-0.87)		0.079	0.107	T	0.207406	0.84 (0.76-1.10)		0.089	0.111	T	0.102905	0.84 (0.68-1.04)		0.1101	0.1645	T	0.1183	0.64 (0.37-1.12)		0.1042	0.1215	T	0.700519	0.94 (0.70-1.27)		T	0.513	0.004
rs6979890	7	18659918	G/A		0.307	0.364	A	0.000911539	0.80 (0.70-0.91)		0.325	0.364	A	0.165759	0.89 (0.60-1.05)		0.346	0.341	A	0.470956	1.05 (0.92-1.19)		0.3616	0.3861	A	0.7714	0.95 (0.66-1.37)		0.3958	0.3606	A	0.311198	1.10 (0.91-1.33)		A	0.796	0.243
rs6460708	7	71350071	C/T		0.217	0.253	T	0.0122732	0.83 (0.72-0.96)		0.208	0.233	T	0.2185	0.89 (0.81-1.07)		0.235	0.242	T	0.672756	0.97 (0.84-1.12)		0.2409	0.269	T	0.5741	0.89 (0.59-1.34)		0.3172	0.2576	T	0.156839	1.16 (0.95-1.41)		T	0.518	0.137
rs12699131	7	71389252	A/G		0.306	0.346	G	0.0135631	0.85 (0.74-0.97)		0.299	0.314	G	0.579504	0.95 (0.36-1.13)		0.322	0.343	G	0.207368	0.92 (0.81-1.05)		0.3378	0.35	G	0.878	0.97 (0.67-1.41)		0.4096	0.3508	G	0.205323	1.13 (0.94-1.35)		G	0.567	0.235
rs6963635	7	83431741	C/T		0.021	0.043	T	0.000890226	0.53 (0.36-0.77)		0.02	0.039	T	0.0265893	0.58 (0.99-0.94)		0.03	0.033	T	0.788716	0.95 (0.68-1.35)		0.0333	0.0625	T	0.2376	0.58 (0.24-1.43)		0.0312	0.0259	T	0.805789	1.07 (0.62-1.85)		T	0.181	0
rs10258404	7	122451931	T/C		0.139	0.093	C	4.60995e-05	1.50 (1.23-1.82)		0.134	0.108	C	0.0572078	1.25 (0.99-1.57)		0.12	0.114	C	0.604218	1.05 (0.87-1.27)		0.1261	0.1086	C	0.5558	1.18 (0.68-2.06)		0.1211	0.131	C	0.712418	0.95 (0.72-1.25)		C	0	0.128
rs7786043	7	140888511	C/A		0.217	0.166	A	7.96215e-05	1.39 (1.18-1.64)		0.201	0.166	A	0.0653028	1.21 (0.93-1.48)		0.187	0.173	A	0.338084	1.08 (0.92-1.27)		0.1875	0.1646	A	0.5336	1.15 (0.73-1.81)		0.1158	0.176	A	0.055149	0.77 (0.58-1.01)		A	0.009	0.217
rs2907684	7	157232178	C/T		0.187	0.145	T	0.000483712	1.36 (1.14-1.61)		0.179	0.158	T	0.231251	1.13 (0.73-1.38)		0.163	0.162	T	0.992309	1.00 (0.85-1.18)		0.1227	0.2194	T	0.003176	0.47 (0.28-0.77)		0.2151	0.2025	T	0.742614	1.04 (0.83-1.30)		T	0.133	0.212
rs17124738	8	17415668	T/G		0.349	0.4	G	0.000206927	0.78 (0.69-0.89)		0.362	0.384	G	0.0714829	0.86 (0.64-1.01)		0.371	0.369	G	0.885118	0.99 (0.87-1.13)		0.3604	0.3513	G	0.9584	1.01 (0.70-1.47)		0.3118	0.3272	G	0.823039	0.98 (0.80-1.19)		G	0.04	0.42
rs773506	9	93015292	G/A		0.179	0.233	A	0.000326597	0.75 (0.65-0.88)		0.174	0.223	A	0.0130443	0.78 (0.67-0.95)		0.229	0.226	A	0.518878	1.05 (0.91-1.21)		0.25	0.2405	A	0.6068	1.11 (0.74-1.68)		0.2181	0.2605	T	0.147769	0.86 (0.69-1.06)		A	0.634	0.125
rs2482338	9	93077694	C/T		0.191	0.242	T	0.00106242	0.78 (0.67-0.90)		0.201	0.237	T	0.108509	0.86 (0.62-1.03)		0.241	0.235	T	0.383497	1.06 (0.93-1.22)		0.2675	0.2671	T	0.7747	1.06 (0.72-1.56)		0.2606	0.2702	T	0.653801	0.95 (0.78-1.16)		T	0.633	0.155
rs1995933	9	93082528	T/C		0.094	0.115	C	0.210646	0.88 (0.71-1.08)		0.088	0.12	C	0.108183	0.81 (0.45-1.05)		0.127	0.125	C	0.430143	1.08 (0.90-1.29)		0.1681	0.1516	C	0.3908	1.24 (0.76-2.00)		0.133	0.1362	C	0.586511	0.93 (0.16-5.47)		C	0.585	0.013
rs2779541	9	100429660	C/T		0.028	0.045	T	0.00897785	0.64 (0.45-0.89)		0.028	0.039	T	0.091674	0.69 (0.51-1.06)		0.031	0.033	T	0.704692	0.94 (0.67-1.31)		0.018	0.039	T	0.2012	0.47 (0.15-1.50)		0.0567	0.0527	T	0.978742	0.99 (0.65-1.51)		T	0.111	0.018
rs2778917	9	100430094	T/C		0.034	0.052	C	0.0125844	0.67 (0.49-0.92)		0.035	0.047	C	0.144247	0.75 (0.77-1.10)		0.038	0.04	C	0.715085	0.94 (0.69-1.28)		0.018	0.0519	C	0.07424	0.37 (0.12-1.10)		0.0619	0.0649	C	0.781884	0.95 (0.65-1.39)		C	0.111	0.027
rs1616895	10	34793436	T/G		0.104	0.147	G	0.00117324	0.72 (0.59-0.88)		0.118	0.136	G	0.828646	0.97 (0.75-1.24)		0.119	0.139	G	0.176868	0.88 (0.73-1.06)		0.1743	0.1783	G	0.8045	1.06 (0.65-1.73)		0.1292	0.187	G	0.0309248	0.74 (0.56-0.98)		G	0.69	0.022
rs773991	10	34827097	C/T		0.104	0.147	T	0.00118716	0.72 (0.59-0.88)		0.114	0.133	T	0.649545	0.95 (0.75-1.20)		0.116	0.14	T	0.0778775	0.85 (0.71-1.02)		0.1652	0.1709	T	0.7963	1.07 (0.65-1.75)		0.1117	0.1785	T	0.00989491	0.70 (0.53-0.93)		T	0.69	0.022
rs17103805	10	86418457	A/G		0.139	0.101	G	0.0003091	1.43 (1.18-1.73)		0.141	0.103	G	0.00324112	1.42 (0.90-1.79)		0.136	0.129	G	0.46071	1.07 (0.89-1.28)		0.1409	0.1384	G	0.9192	1.03 (0.63-1.67)		0.1649	0.1146	G	0.151057	1.23 (0.93-1.62)		G	0.133	0.128
rs2722769	11	11184950	C/G		0.06	0.096	G	0.000585517	0.66 (0.52-0.83)		0.056	0.086	G	0.0446214	0.73 (0.55-0.99)		0.07	0.094	G	0.0224134	0.77 (0.62-0.96)		0.1036	0.1161	G	0.7973	0.93 (0.54-1.61)		0.0421	0.0847	G	0.0683408	0.72 (0.51-1.04)		G	0.442	0.013
rs11021927	11	11533125	C/A		0.05	0.077	A	0.00313708	0.66 (0.51-0.87)		0.044	0.063	A	0.15798	0.78 (0.77-1.10)		0.054	0.071	A	0.0615855	0.78 (0.61-1.01)		0.0818	0.1019	A	0.5062	0.82 (0.45-1.48)		0.0691	0.0557	A	0.771431	1.06 (0.73-1.53)		A	0.332	0.004
rs12275254	11	83021566	C/T		0.308	0.362	T	0.0022842	0.81 (0.71-0.93)		0.322	0.353	T	0.235877	0.91 (0.99-1.07)		0.331	0.327	T	0.439338	1.05 (0.92-1.20)		0.3304	0.3981	T	0.1503	0.77 (0.53-1.10)		0.3564	0.3471	A	0.81428	0.98 (0.80-1.19)		T	0.659	0.248
rs17145930	11	83080454	G/T		0.266	0.214	T	0.000586134	1.30 (1.12-1.51)		0.257	0.214	T	0.0600619	1.19 (0.76-1.43)		0.242	0.233	T	0.678053	1.03 (0.89-1.19)		0.2523	0.2372	T	0.8174	1.05 (0.68-1.62)		0.2316	0.245	A	0.635357	0.95 (0.77-1.17)		T	0	0.279
rs650297	11	99954352	T/G		0.219	0.272	G	0.000206944	0.76 (0.65-0.88)		0.24	0.262	G	0.316408	0.91 (0.70-1.09)		0.264	0.258	G	0.551981	1.04 (0.91-1.20)		0.2045	0.2247	G	0.5457	0.88 (0.57-1.35)		0.1854	0.2458	G	0.0898684	0.82 (0.65-1.03)		G	0.35	0.235
rs7107217	11	128978900	C/A		0.421	0.48	A	0.000192514	0.78 (0.69-0.89)		0.433	0.483	A	0.00576021	0.81 (1.08-0.94)		0.444	0.482	A	0.0162493	0.86 (0.76-0.97)		0.4865	0.4615	A	0.6356	1.08 (0.78-1.51)		0.3404	0.4137	A	0.146213	0.87 (0.73-1.05)		A	0.504	0.478
rs12426222	12	20477907	A/T		0.263	0.211	T	0.000269062	1.31 (1.13-1.52)		0.289	0.239	T	0.00560134	1.28 (1.14-1.53)		0.252	0.231	T	0.157336	1.11 (0.96-1.28)		0.2591	0.2244	T	0.4053	1.20 (0.79-1.82)		0.2083	0.2455	T	0.352247	0.90 (0.73-1.12)		T	0.051	0.263
rs10047560	12	20496483	G/A		0.426	0.372	A	0.00383786	1.21 (1.06-1.37)		0.465	0.383	A	0.000298622	1.32 (0.65-1.54)		0.418	0.401	A	0.523586	1.04 (0.92-1.17)		0.4159	0.3987	A	0.854	1.03 (0.73-1.47)		0.4415	0.4605	A	0.626055	0.96 (0.79-1.15)		A	0.013	0.509
rs11175885	12	64400897	A/G		0.181	0.234	G	0.00128991	0.77 (0.66-0.90)		0.19	0.249	G	0.0106394	0.78 (0.62-0.95)		0.228	0.229	G	0.559834	1.04 (0.90-1.21)		0.289	0.2871	G	0.7552	1.06 (0.72-1.58)		0.2917	0.261	G	0.32151	1.11 (0.90-1.37)		G	0.929	0.106
rs2358944	12	64403825	G/A		0.178	0.232	A	0.000948115	0.77 (0.65-0.90)		0.188	0.256	A	0.001818	0.74 (0.51-0.90)		0.23	0.225	A	0.29983	1.08 (0.93-1.25)		0.2883	0.2707	A	0.4585	1.16 (0.78-1.72)		0.25	0.2626	A	0.78639	0.97 (0.79-1.20)		A	0.863	0.117
rs12827976	12	65560052	G/T		0.063	0.09	T	0.00648401	0.72 (0.57-0.91)		0.063	0.101	T	0.00508824	0.67 (0.68-0.89)		0.076	0.084	T	0.540383	0.93 (0.75-1.17)		0.0885	0.0994	T	0.7758	0.92 (0.50-1.67)		0.1129	0.0756	T	0.0899914	1.33 (0.96-1.84)		T	0.274	0.066
rs1504314	12	65581939	C/T		0.144	0.183	T	0.00268289	0.77 (0.65-0.91)		0.143	0.169	T	0.107946	0.84 (0.63-1.04)		0.162	0.179	T	0.230809	0.91 (0.77-1.07)		0.2432	0.242	T	0.9584	1.01 (0.67-1.52)		0.2222	0.1881	T	0.550681	1.07 (0.85-1.34)		T	0.335	0.146
rs2904532	12	65582311	A/G		0.141	0.183	G	0.000817387	0.75 (0.63-0.89)		0.148	0.184	G	0.0172235	0.78 (0.63-0.96)		0.176	0.17	G	0.507427	1.06 (0.90-1.24)		0.1591	0.2179	G	0.1248	0.71 (0.46-1.10)		0.1968	0.1797	G	0.726386	1.04 (0.83-1.31)		G	0.274	0.168
rs11176482	12	65582814	T/C		0.141	0.184	C	0.000708311	0.74 (0.63-0.88)		0.147	0.182	C	0.020185	0.78 (0.67-0.96)		0.175	0.171	C	0.645674	1.04 (0.88-1.22)		0.1636	0.2212	C	0.1358	0.72 (0.47-1.11)		0.2021	0.1798	C	0.615031	1.06 (0.84-1.33)		C	0.274	0.168
rs1875831	12	65585331	T/C		0.123	0.085	C	0.000186414	1.49 (1.21-1.83)		0.117	0.097	C	0.131065	1.21 (0.68-1.54)		0.106	0.106	C	0.921336	0.99 (0.82-1.20)		0.0759	0.0932	C	0.4674	0.79 (0.43-1.48)		0.0714	0.09	C	0.352456	0.85 (0.61-1.20)		C	0	0.128
rs1125098	12	66912629	G/C		0.063	0.095	C	0.00146	0.68 (0.53-0.86)		0.08	0.104	C	0.307151	0.88 (1.08-1.13)		0.091	0.09	C	0.483876	1.08 (0.87-1.33)		0.1182	0.1503	C	0.4205	0.82 (0.51-1.33)		0.1316	0.106	C	0.225988	1.19 (0.90-1.57)		C	0.381	0.04
rs12302041	12	76654356	G/A		0.085	0.055	A	0.00030878	1.59 (1.24-2.05)		0.088	0.06	A	0.0148738	1.45 (1.09-1.95)		0.067	0.063	A	0.670795	1.06 (0.82-1.35)		0.0721	0.0552	A	0.4597	1.31 (0.64-2.66)		0.0412	0.0783	A	0.102978	0.72 (0.49-1.06)		A	0	0.102
rs9533481	13	42887185	T/C		0.521	0.468	C	9.94305e-05	1.29 (1.14-1.47)		0.504	0.459	C	0.00272244	1.27 (0.75-1.49)		0.504	0.494	T	0.696821	1.02 (0.91-1.16)		0.5	0.4472	T	0.3327	1.19 (0.84-1.69)		0.4362	0.506	A	0.164691	0.88 (0.73-1.06)		C	0.885	0.451
rs9598671	13	63430485	T/G		0.19	0.24	G	4.95418e-05	0.73 (0.62-0.85)		0.201	0.214	G	0.31623	0.91 (0.80-1.10)		0.185	0.209	G	0.0399971	0.85 (0.73-0.99)		0.1927	0.1961	G	0.8962	0.97 (0.64-1.48)		0.1739	0.1971	G	0.766226	0.97 (0.77-1.21)		G	0.102	0.221
rs7322510	13	105280803	T/A		0.394	0.45	A	0.000378843	0.79 (0.70-0.90)		0.405	0.421	A	0.348896	0.93 (1.05-1.08)		0.412	0.449	A	0.0162497	0.86 (0.76-0.97)		0.4241	0.4193	A	0.8876	1.03 (0.72-1.47)		0.3876	0.4177	A	0.477571	0.93 (0.77-1.13)		A	0.372	0.381
rs1950321	14	39076935	C/G		0.088	0.056	G	0.000331008	1.57 (1.23-2.02)		0.084	0.06	G	0.0238218	1.41 (1.01-1.91)		0.084	0.068	G	0.0746759	1.24 (0.98-1.56)		0.0759	0.0759	G	0.8564	0.94 (0.49-1.8)		0.0211	0.057	G	0.0197978	0.56 (0.33-0.95)		G	0.024	0.08
rs12896482	14	43597018	T/C		0.362	0.314	C	0.00314651	1.22 (1.07-1.39)		0.357	0.318	C	0.0385789	1.19 (0.71-1.40)		0.348	0.314	C	0.0326165	1.15 (1.01-1.31)		0.3208	0.3409	C	0.5477	0.89 (0.62-1.29)		0.3385	0.344	C	0.907516	0.99 (0.82-1.19)		C	0.102	0.42
rs1504608	14	56542041	T/C		0.276	0.333	C	0.000342297	0.78 (0.68-0.89)		0.297	0.34	C	0.0379235	0.84 (0.66-0.99)		0.293	0.317	C	0.171217	0.91 (0.80-1.04)		0.3451	0.2938	C	0.1966	1.28 (0.88-1.87)		0.383	0.3398	C	0.182832	1.14 (0.94-1.39)		C	0.549	0.296
rs1978243	14	86596160	C/T		0.22	0.274	T	0.00075266	0.78 (0.67-0.90)		0.221	0.274	T	0.0105392	0.79 (0.55-0.95)		0.255	0.255	T	0.726439	1.03 (0.89-1.18)		0.2658	0.2806	T	0.9165	0.98 (0.65-1.46)		0.2526	0.2261	T	0.492228	1.08 (0.87-1.33)		T	0.577	0.207
rs16946080	15	60982664	G/A		0.047	0.073	A	0.000442614	0.62 (0.47-0.81)		0.052	0.067	A	0.0963954	0.76 (1.03-1.05)		0.061	0.056	A	0.355361	1.13 (0.87-1.47)		0.0354	0.0586	A	0.2503	0.61 (0.26-1.42)		0.0579	0.0575	A	0.733242	0.93 (0.63-1.39)		A	0.076	0.053
rs6494387	15	61132579	G/A		0.367	0.311	A	0.000232422	1.29 (1.12-1.47)		0.358	0.32	A	0.0208865	1.21 (0.61-1.43)		0.332	0.325	A	0.660528	1.03 (0.91-1.17)		0.3063	0.3693	A	0.1307	0.75 (0.51-1.09)		0.3385	0.3583	A	0.827451	0.98 (0.81-1.18)		A	0.335	0.412
rs16970839	15	77396485	G/A		0.075	0.112	A	2.64364e-05	0.63 (0.50-0.78)		0.086	0.104	A	0.0716557	0.79 (0.98-1.02)		0.084	0.088	A	0.602007	0.95 (0.76-1.17)		0.0848	0.0791	A	0.9448	1.02 (0.54-1.92)		0.1277	0.1289	A	0.773434	0.96 (0.72-1.28)		A	0	0.111
rs8050688	16	2938630	T/G		0.511	0.457	G	0.00234241	1.22 (1.07-1.38)		0.476	0.434	G	0.088705	1.14 (0.60-1.34)		0.474	0.474	G	0.756284	0.98 (0.87-1.11)		0.4375	0.4531	G	0.5938	0.91 (0.64-1.29)		0.4415	0.4413	G	0.853375	0.98 (0.82-1.18)		G	0.192	0.535
rs8043824	16	78404643	G/A		0.125	0.169	A	0.00457926	0.76 (0.63-0.92)		0.12	0.169	A	0.0149051	0.76 (0.69-0.95)		0.16	0.17	A	0.911589	1.01 (0.85-1.20)		0.133	0.212	A	0.03402	0.59 (0.37-0.96)		0.172	0.2038	A	0.214976	0.86 (0.67-1.10)		A	0.841	0.031
rs2654467	16	78933523	G/T		0.242	0.298	T	0.00113112	0.78 (0.68-0.91)		0.253	0.308	T	0.0303342	0.83 (0.63-0.98)		0.288	0.286	T	0.427468	1.06 (0.92-1.21)		0.3009	0.3344	T	0.5471	0.89 (0.62-1.29)		0.3245	0.3293	T	0.855622	0.98 (0.80-1.20)		T	0.826	0.173
rs170492	17	34291297	C/G		0.046	0.072	G	0.00388292	0.67 (0.51-0.88)		0.057	0.079	G	0.19263	0.83 (0.72-1.10)		0.078	0.068	G	0.107742	1.20 (0.96-1.49)		0.0893	0.1242	G	0.3146	0.75 (0.44-1.31)		0.0833	0.1061	G	0.567606	0.92 (0.69-1.23)		G	0.275	0.013
rs1285264	17	75464091	C/G		0.204	0.254	G	0.00061383	0.77 (0.66-0.89)		0.207	0.245	G	0.0964146	0.86 (1.02-1.03)		0.238	0.255	G	0.327188	0.93 (0.81-1.07)		0.2778	0.2325	G	0.2328	1.27 (0.86-1.86)		0.2979	0.2671	G	0.419784	1.09 (0.89-1.33)		G	0.624	0.181
rs1271784	18	30972595	A/T		0.255	0.221	T	0.000358692	1.32 (1.14-1.55)		0.264	0.239	T	0.0332613	1.23 (1.00-1.49)		0.278	0.259	T	0.0670265	1.16 (0.99-1.35)		0.2621	0.2925	T	0.5965	0.89 (0.58-1.36)		0.3	0.2688	T	0.385537	1.09 (0.89-1.34)		T	0.761	0.161
rs10419511	19	17595848	C/T		0.421	0.365	T	0.000327702	1.27 (1.11-1.44)		0.417	0.379	T	0.0500784	1.17 (1.03-1.36)		0.398	0.387	T	0.509041	1.04 (0.92-1.18)		0.4554	0.3906	T	0.1234	1.32 (0.93-1.87)		0.2926	0.332	T	0.266737	0.89 (0.74-1.09)		T	0.412	0.376
rs372889	19	18034603	C/T		0.529	0.469	T	0.000125526	1.27 (1.13-1.44)		0.513	0.468	T	0.0182502	1.20 (0.91-1.39)		0.488	0.504	C	0.227534	0.93 (0.82-1.05)		0.5045	0.4684	T	0.4647	1.14 (0.80-1.63)		0.5691	0.4837	C	0.0283257	1.24 (1.02-1.50)		T	0.478	0.465
rs3218064	19	35004190	C/T		0.082	0.052	T	0.000335645	1.61 (1.24-2.08)		0.071	0.056	T	0.175874	1.24 (0.60-1.68)		0.066	0.083	T	0.030357	0.77 (0.61-0.98)		0.0439	0.087	T	0.06453	0.50 (0.24-1.04)		0.0957	0.0563	T	0.0536155	1.40 (1.00-1.97)		T	0	0.08
rs11670126	19	38373310	G/A		0.076	0.111	A	0.0063404	0.73 (0.58-0.92)		0.065	0.092	A	0.136814	0.80 (0.89-1.07)		0.092	0.112	A	0.196335	0.87 (0.70-1.07)		0.1712	0.134	A	0.1317	1.46 (0.89-2.38)		0.125	0.1394	A	0.44096	0.90 (0.68-1.18)		A	0.64	0
rs7281104	21	14840448	G/C		0.389	0.337	C	0.000950793	1.25 (1.10-1.43)		0.364	0.356	C	0.566436	1.05 (0.57-1.23)		0.341	0.358	C	0.201161	0.92 (0.81-1.05)		0.3018	0.3386	C	0.3365	0.84 (0.58-1.20)		0.2957	0.3497	C	0.133254	0.86 (0.71-1.04)		C	0.208	0.381
rs9981433	21	40231435	T/G		0.104	0.147	G	5.51981e-05	0.67 (0.56-0.82)		0.111	0.148	G	0.00373544	0.71 (0.41-0.90)		0.125	0.123	G	0.853106	1.02 (0.84-1.23)		0.1396	0.1538	G	0.7779	0.93 (0.57-1.53)		0.1042	0.0802	G	0.451289	1.13 (0.83-1.54)		G	0.058	0.111
rs1034589	22	29909233	T/C		0.036	0.062	C	0.000985691	0.60 (0.44-0.81)		0.033	0.065	C	0.00546647	0.59 (0.70-0.86)		0.052	0.052	C	0.658667	1.06 (0.81-1.41)		0.0405	0.087	C	0.03503	0.43 (0.19-0.94)		0.0745	0.0566	C	0.55244	1.12 (0.78-1.60)		C	0.301	0
rs2106294	22	29975759	T/C		0.035	0.062	C	0.000748849	0.59 (0.43-0.80)		0.031	0.064	C	0.00276149	0.56 (0.38-0.82)		0.053	0.053	C	0.7733	1.04 (0.79-1.37)		0.036	0.0897	C	0.01757	0.37 (0.16-0.84)		0.0729	0.0562	C	0.599344	1.10 (0.77-1.58)		C	0.305	0
rs4820043	22	29977094	G/A		0.036	0.062	A	0.000985691	0.60 (0.44-0.81)		0.031	0.065	A	0.00259678	0.56 (0.68-0.82)		0.053	0.052	A	0.623638	1.07 (0.81-1.41)		0.0402	0.0881	A	0.03332	0.42 (0.19-0.93)		0.0737	0.0563	A	0.581623	1.11 (0.78-1.58)		A	0.305	0
rs7287402	22	29984823	C/T		0.176	0.196	T	0.228493	0.91 (0.77-1.06)		0.156	0.19	T	0.10122	0.84 (0.71-1.03)		0.201	0.202	T	0.773056	1.02 (0.88-1.19)		0.1875	0.2298	T	0.2305	0.77 (0.50-1.18)		0.1685	0.2053	T	0.303587	0.89 (0.70-1.12)		T	0.478	0.119
rs739427	22	29989101	G/C		0.175	0.196	C	0.216978	0.90 (0.77-1.06)		0.163	0.192	C	0.193496	0.87 (0.40-1.07)		0.202	0.201	C	0.725608	1.03 (0.88-1.19)		0.1875	0.2298	C	0.2305	0.77 (0.50-1.18)		0.1685	0.2055	C	0.296496	0.88 (0.72-1.09)		C	0.478	0.119
rs5749286	22	30230359	C/A		0.038	0.065	A	0.00131938	0.61 (0.46-0.83)		0.036	0.068	A	0.00299807	0.58 (0.49-0.83)		0.054	0.052	A	0.552788	1.09 (0.83-1.43)		0.0491	0.0839	A	0.121	0.55 (0.26-1.17)		0.0745	0.0586	A	0.620391	1.10 (0.76-1.57)		A	0.283	0
rs5749682	22	32578314	C/A		0.044	0.07	A	0.000873952	0.62 (0.47-0.82)		0.042	0.065	A	0.0300702	0.69 (0.52-0.96)		0.056	0.055	A	0.733752	1.05 (0.80-1.36)		0.0682	0.0764	A	0.8837	0.95 (0.48-1.87)		0.0684	0.0503	T	0.400789	1.19 (0.73-1.94)		A	0.204	0.009
rs17809399	22	32587133	G/A		0.051	0.079	A	0.00202475	0.66 (0.51-0.86)		0.053	0.08	A	0.0315587	0.71 (0.73-0.97)		0.062	0.065	A	0.970774	1.00 (0.78-1.28)		0.0804	0.0559	A	0.263	1.50 (0.74-3.03)		0.087	0.0647	A	0.372629	1.18 (0.82-1.70)		A	0.279	0.009
rs5754731	22	32599491	A/G		0.281	0.312	G	0.0408551	0.87 (0.76-0.99)		0.273	0.302	G	0.0860381	0.86 (0.94-1.02)		0.283	0.302	G	0.135365	0.90 (0.79-1.03)		0.3142	0.3196	G	0.8672	0.97 (0.68-1.39)		0.3457	0.3371	G	0.913235	1.01 (0.84-1.22)		G	0.314	0.403
rs6000082	22	34773621	C/T		0.141	0.11	T	0.00412124	1.33 (1.09-1.61)		0.136	0.114	T	0.148906	1.18 (0.96-1.49)		0.122	0.118	T	0.787512	1.03 (0.85-1.23)		0.1562	0.1615	T	0.8837	0.96 (0.59-1.58)		0.125	0.1227	T	0.806613	0.96 (0.71-1.31)		T	0.031	0.161
rs16996292	22	34775479	G/A		0.122	0.084	A	0.000102249	1.52 (1.23-1.89)		0.118	0.094	A	0.0942228	1.23 (0.77-1.58)		0.101	0.098	A	0.845943	1.02 (0.83-1.25)		0.1161	0.1366	A	0.4592	0.81 (0.46-1.42)		0.087	0.0908	A	0.518296	0.89 (0.63-1.26)		A	0.004	0.142
rs6518987	22	34775538	C/T		0.426	0.502	T	3.16217e-05	0.76 (0.67-0.87)		0.427	0.467	T	0.164889	0.90 (0.72-1.04)		0.475	0.476	T	0.697405	1.02 (0.91-1.16)		0.4364	0.513	T	0.1494	0.77 (0.54-1.10)		0.4505	0.4715	T	0.741597	0.97 (0.80-1.17)		T	0.996	0.353
rs16996381	22	34841225	A/G		0.336	0.391	G	0.00182561	0.81 (0.71-0.93)		0.371	0.432	G	0.0191134	0.84 (0.54-0.97)		0.413	0.386	G	0.0385994	1.14 (1.01-1.28)		0.4273	0.4809	G	0.3501	0.85 (0.61-1.19)		0.4167	0.4242	G	0.835443	0.98 (0.83-1.16)		G	0.841	0.257
rs735853	22	35009161	C/G		0.082	0.123	G	0.000459116	0.69 (0.56-0.85)		0.079	0.118	G	0.009069	0.70 (0.54-0.92)		0.116	0.118	G	0.816744	1.02 (0.84-1.25)		0.1116	0.1433	G	0.4151	0.80 (0.46-1.37)		0.1183	0.1478	G	0.429657	0.90 (0.68-1.17)		G	0.477	0.031
